# Supplementary material
Source: PubMed Central journal article supplement (PMC6295664)
Supplement: NIHMS996203-supplement-Figure_legend.pdf [file NIHMS996203-supplement-Figure_legend.pdf]

## Supplemental figure legends

**Supplemental Figure 1. The effects of G1T28 are due to CDK4/6 inhibition.** **A.** VCaP and 22Rv1 cells were plated in media containing 10% FBS and increasing concentrations of G1T28 ( $10^{-10}$ - $10^{-6}$  M) for 24 hours. Following treatment cells were fixed, permeabilized and stained for AR, and Actin. Cells were imaged using the LI-COR Clx and densitometry calculated from the LI-COR Image Studio software. **B.** VCaP cells were plated in phenol red free media containing 10% charcoal stripped serum for 48 hours before treating with 1nM R1881 in the absence or presence of 1 $\mu$ M G1T28 for 24 hours. After treatment, RNA was isolated, reverse transcribed and analyzed for the expression of the AR target genes ORM and PSA. Data was calculated using the  $\Delta\Delta C_t$  method. **C.** VCaP and 22Rv1 cells were plated in media containing 10% FBS and treated with increasing concentrations of G1T28 ( $10^{-8}$ - $10^{-6}$  M) for 24 hours. Following treatment, protein was isolated and immunoblotted for phospho-Rb (S807/811), total Rb, cyclin A, E, D, CDK 4 and alpha-tubulin. **D.** PC3 or DU145 cells were plated in media containing 10% FBS and treated with increasing concentrations G1T28 ( $10^{-10}$ - $10^{-4.3}$  M) and measured for cell viability by Hoechst staining after 5-7 days of treatment. Data are representative of at least 3 independent experiments.

**Supplemental Figure 2. Analysis of pharmacodynamics endpoints indicates on-target activity in 22Rv1 tumors.** **A.** Levels of AR, AR-V7, phospho-Rb, and total Rb were evaluated by immunoblot in 22Rv1 tumors harvested from two mice per group euthanized after 10 days of treatment from the efficacy study in Figure 2. **B.** Chemical structure of CDK4/6 inhibitor G1T38.

**Supplemental Figure 3. G1T38 and G128 have similar *in vitro* efficacy.** **A.** LNCaP, VCaP and 22Rv1 cells were plated in media containing 10% FBS and increasing concentrations of G1T28 or G1T38 ( $10^{-9}$ - $10^{-6}$  M) for 24 hours. Following treatment cells were fixed, permeabilized and stained for phosphorylated Rb (pRb) or total Rb. Cells were imaged using the LI-COR Clx and dose response curves were generated from densitometry of the phospho/total Rb expression using LI-COR Image Studio software. **B.** LNCaP, VCaP, or 22Rv1 cells were plated in media containing 10% FBS and treated with increasing concentrations of G1T28 and G1T38 ( $10^{-9}$ - $10^{-5.5}$  M) and measured for cell viability by Hoescht staining after 5-7 days of treatment. **C.** PC3 or DU145 cells were plated in media containing 10% FBS and treated with increasing concentrations of G1T28 and G1T38 ( $10^{-9}$ - $10^{-5.5}$  M) and measured for cell viability by Hoechst staining after 5-7 days of treatment. **A-C.** Data are representative of at least 3 independent experiments. **D.** Individual body weight was measured for 28 days in mice bearing 22Rv1 xenografts treated with Vehicle, G1T38 (100mg/kg, p.o, q.d.), or docetaxel (20 mg/kg, i.p., q.w.).

**Supplemental Figure 4. G1T28 inhibits anti-androgen stimulated prostate cancer cell growth.** **A.** LnCAP cells stably expressing a control plasmid pQC-XIP (XIP), wild type AR (XIP-AR) or AR with the activating F876L point mutation (XIP-AR F876L) were plated in phenol red free media containing 10% charcoal stripped serum and treated with increasing concentrations of G1T28, or the anti-androgens casodex or enzalutamide ( $10^{-9}$ - $10^{-4}$  M). **B.** LnCAP-AR or LnCAP-AR F876L cells were treated with 25 $\mu$ M or 20 $\mu$ M of casodex or enzalutamide respectively in the presence of increasing concentrations of G1T28. Cell viability was measured by Hoechst staining after 5-7 days of treatment. Data are representative of at least 3 independent experiments.
