# Supplementary material
Source: PubMed Central journal article supplement (PMC6295664)

Stice et al  
Suppl. Figure 1

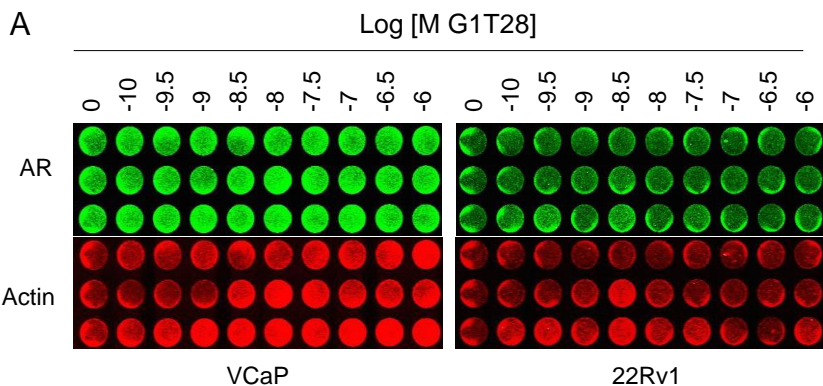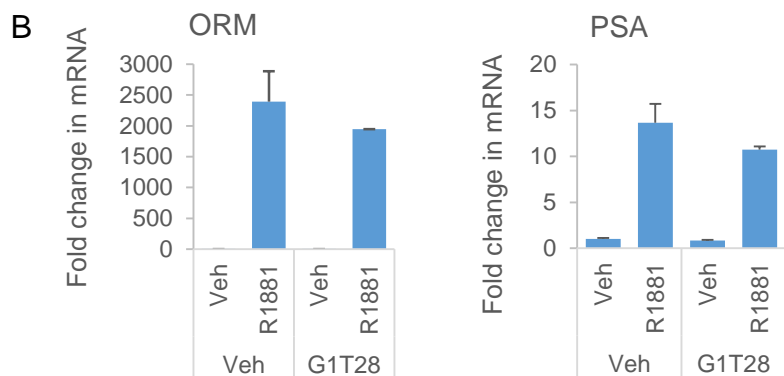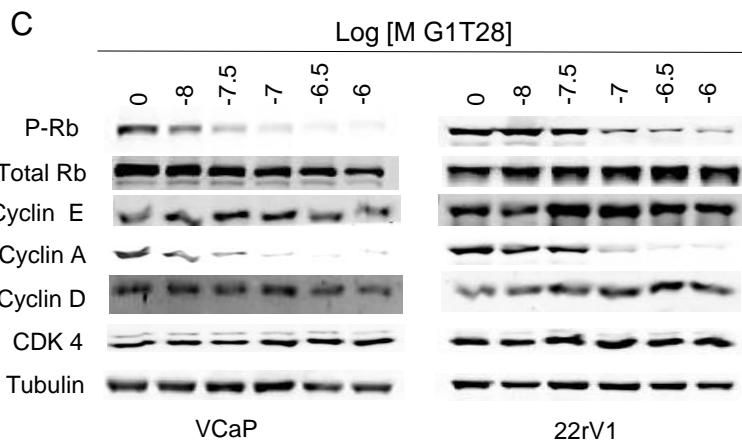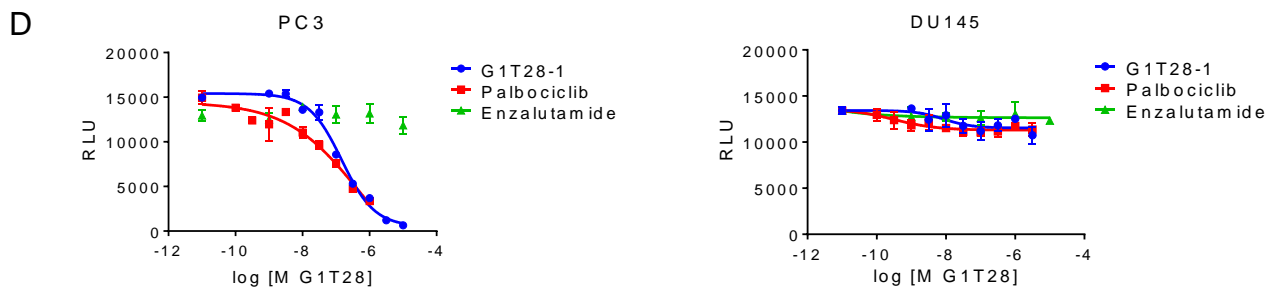

A

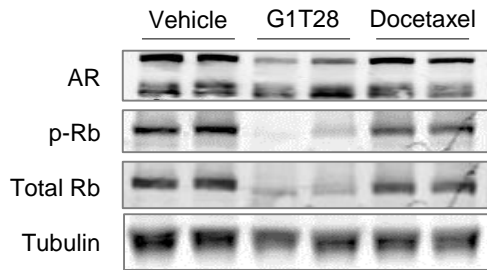

B

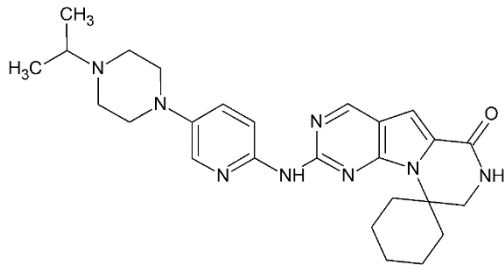

Stice et al  
Suppl. Figure 3

A

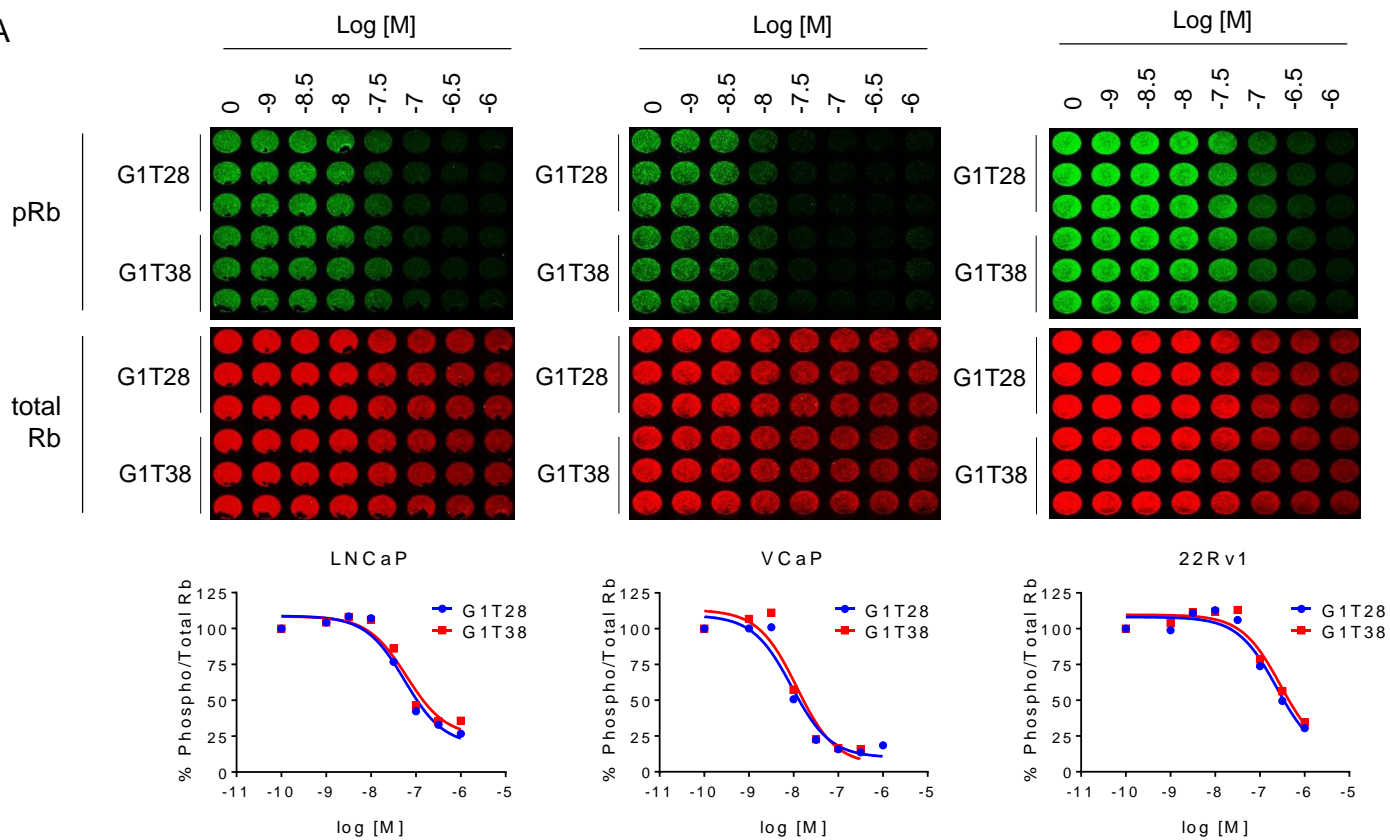

B

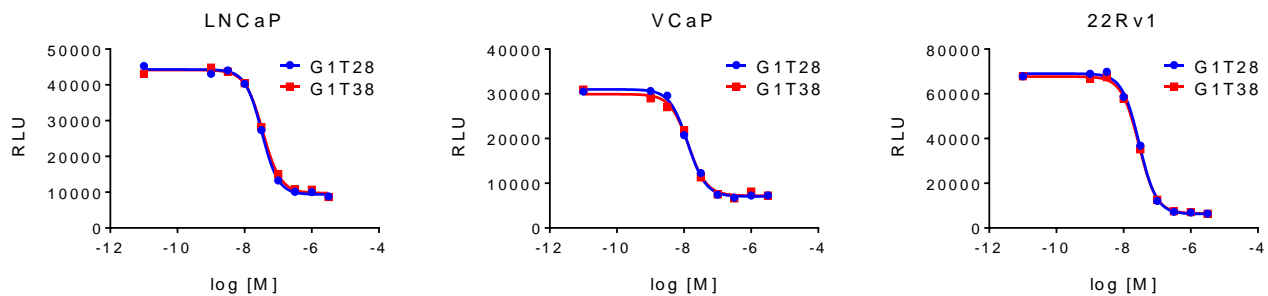

C

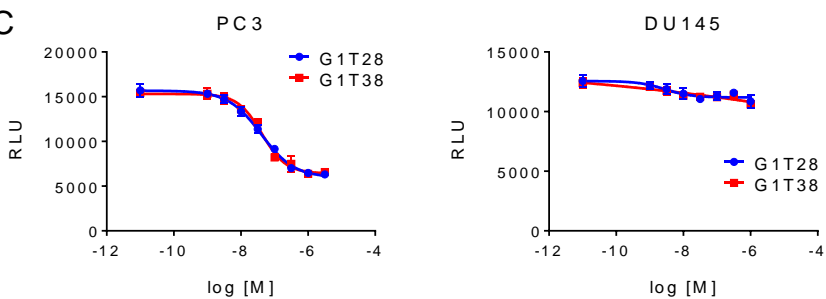

D

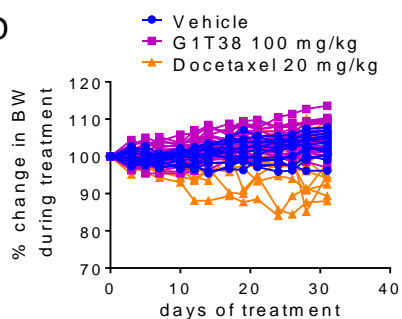

Stice et al  
Suppl. Figure 4

A

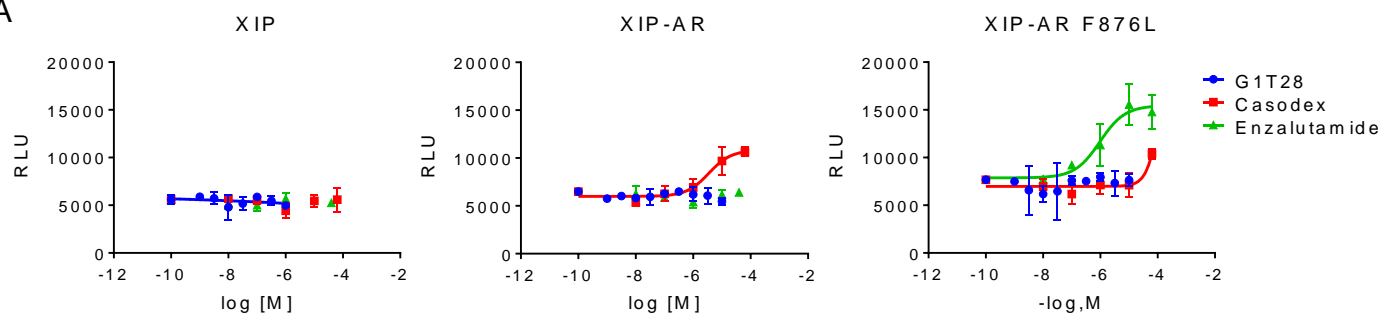

B

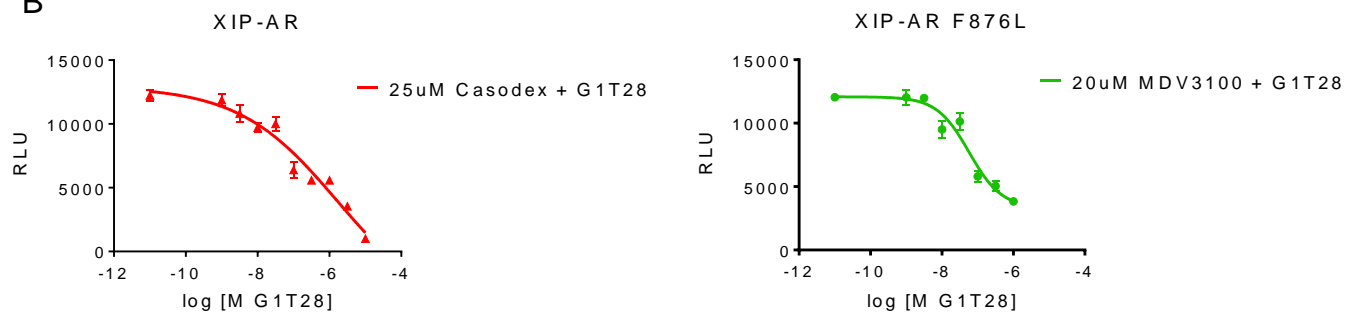

Supplement: NIHMS996203-supplement-Figure_1.pdf [file NIHMS996203-supplement-Figure_1.pdf]
